# A Framework for Brain Atlases: Lessons from Seizure Dynamics

Andrew Y. Revell<sup>\*,1,2,a</sup>, Alexander B. Silva<sup>2,3,a</sup>, T. Campbell Arnold<sup>2,3</sup>, Joel M. Stein<sup>2,5</sup>, Sandhitsu R. Das<sup>2,4</sup>, Russell T. Shinohara<sup>6,7</sup>, Danielle S. Bassett<sup>1,2,3,4,9,10,11</sup>, Brian Litt<sup>2,3,4</sup>, and Kathryn A. Davis<sup>1,2,4</sup>

<sup>1</sup>Department of Neuroscience, Perelman School of Medicine, University of Pennsylvania, Philadelphia, PA 19104 USA

<sup>2</sup>Center for Neuroengineering and Therapeutics, University of Pennsylvania, Philadelphia, PA 19104 USA

<sup>3</sup>Department of Bioengineering, School of Engineering and Applied Science, University of Pennsylvania, Philadelphia, PA 19104 USA

<sup>4</sup>Department of Neurology, Perelman School of Medicine, University of Pennsylvania, Philadelphia, PA 19104 USA

<sup>5</sup>Department of Radiology, Perelman School of Medicine, University of Pennsylvania, Philadelphia, PA 19104 USA

<sup>6</sup>Department of Biostatistics, Epidemiology, and Informatics, Perelman School of Medicine, University of Pennsylvania, Philadelphia, PA 19104 USA

<sup>7</sup>Penn Statistics in Imaging and Visualization Endeavor, Perelman school of Medicine, University of Pennsylvania, PA 19104 USA

<sup>8</sup>Center for Biomedical Image Computing and Analytics, Perelman School of Medicine, University of Pennsylvania, PA 19104 USA

<sup>9</sup>Department of Electrical and Systems Engineering, School of Engineering and Applied Science, University of Pennsylvania, Philadelphia, PA 19104 USA

<sup>10</sup>Department of Physics and Astronomy, College of Arts and Sciences, University of Pennsylvania, Philadelphia, PA 19104 USA

<sup>11</sup>Santa Fe Institute, Santa Fe, NM 87501

<sup>a</sup>These authors contributed equally

\*Corresponding author: [andrew.revell@pennmedicine.upenn.edu](mailto:andrew.revell@pennmedicine.upenn.edu)

1 **Understanding the relationship between the brain’s structural anatomy and neural activity is essential in identifying the structural therapeutic targets linked to the functional changes seen in neurological diseases. An implicit challenge is that the varying maps of the brain, or atlases, used across the neuroscience literature to describe the different regions of the brain alters the hypotheses and predictions we make about the brain’s function of those regions. Here we demonstrate how parcellation scale, shape, and anatomical coverage of these atlases impact network topology, structure-function correlation (SFC), and the hypotheses we make about epilepsy disease biology. Through the lens of our disease system, we propose a general framework to evaluate the validity of an atlas used in an experimental system. This framework aims to maximize the descriptive, explanatory, and predictive validity of these atlases. Broadly, our framework strives to augment neuroscience research utilizing the various atlases published over the last century.**

Brain Atlas | Validity | Networks | Epilepsy | Structure-function

## 1 Introduction

2 How we define anatomical brain structures and relate those  
3 structures to the brain’s function can either constrain or enhance  
4 our understanding of the biology of behavior and neurological  
5 diseases<sup>1-4</sup>. Discoveries by scientists like Carl Wernicke  
6 and Pierre Paul Broca who mapped specific brain regions  
7 to speech function, in addition to case studies from Phineas  
8 Gage and H.M. who lost specific brain regions with resultant  
9 changes in brain function and behavior, exemplify how brain  
10 structure and function are fundamentally linked<sup>5-7</sup>. Proper  
11 labeling of brain structures is paramount for effective communication  
12 amongst scientists about the variability between healthy  
13 individuals and about the regions involved in neurological  
14 disorders<sup>8</sup>. Yet no consensus has been reached on the  
15 most appropriate labeling and delineations of these regions, as  
16 manifest in the wide variety of brain maps or atlases defining  
17 neuroanatomical structures<sup>9</sup>.

18 In common usage, an atlas refers to a “collection of maps”<sup>10</sup>  
19 that typically defines geo-political boundaries and may include  
20 coarse borders (continental), fine borders (city), and anything  
21 in between (country; Fig. 1a, left). Borders<sup>11</sup> are usually  
22 consistent across atlases of the world. In contrast, atlases  
23 of the brain are not consistent. Four separate atlases (Fig. 1a,  
24 right) may define the superior temporal gyrus differently. For  
25 example, over ninety percent of the *anterior* superior temporal  
26 gyrus in the Harvard-Oxford atlas<sup>12</sup> overlaps with the *posterior*  
27 superior temporal gyrus in the Hammersmith atlas<sup>13</sup>.  
28 Atlases may also differ in other ways, including the parcellation  
29 size, neuroanatomical coverage, and complexity of brain

region shapes. For instance, the Yeo atlas<sup>14</sup> contains 7 or 17  
parcels while the Schaefer atlases<sup>15</sup> may have between 100  
and 1000 parcels. Complicating matters further, atlases can  
differ in their intended use. The MMP atlas<sup>16</sup> was intended  
for surface-based analyses<sup>17</sup>, yet a volumetric version (without  
subcortical structures) was independently created and used  
in connectivity studies<sup>18</sup>. The plethora of available atlases  
poses a problem for reproducibility in the study of healthy  
and diseased populations and for metaanalyses describing the  
involvement of different regions of the brain in various diseases.  
This has been termed the Atlas Concordance Problem<sup>4</sup>.

In the present study, we perform a comprehensive evaluation  
of the available atlases in the neuroscience literature (Table 1)  
by examining the effect of varying features such as parcellation  
size, coverage, and shape (Fig. 1b) on structural connectivity  
(Fig. 1c) and structure-function correlation (SFC; Fig. 1d).  
Note the important distinction between the terms atlas, template,  
and stereotactic space<sup>9</sup> (see Fig. S1). In the context  
of our disease system, we propose a new framework outlining  
the validity of atlas used across experimental neuroscience  
systems. In our experimental design, we measure structural  
connectivity using high angular resolution diffusion imaging  
(HARDI) to capture the underlying anatomical connections  
between brain regions. We then measure neural activity using  
stereoelectroencephalography (SEEG) in epilepsy patients to  
capture real-time changes in seizure activity with finer temporal  
and spatial resolution than other functional neuroimaging  
modalities<sup>20-22</sup>. Finally, we utilize a total of 52 brain atlases  
freely available in common neuroimaging software to inves-

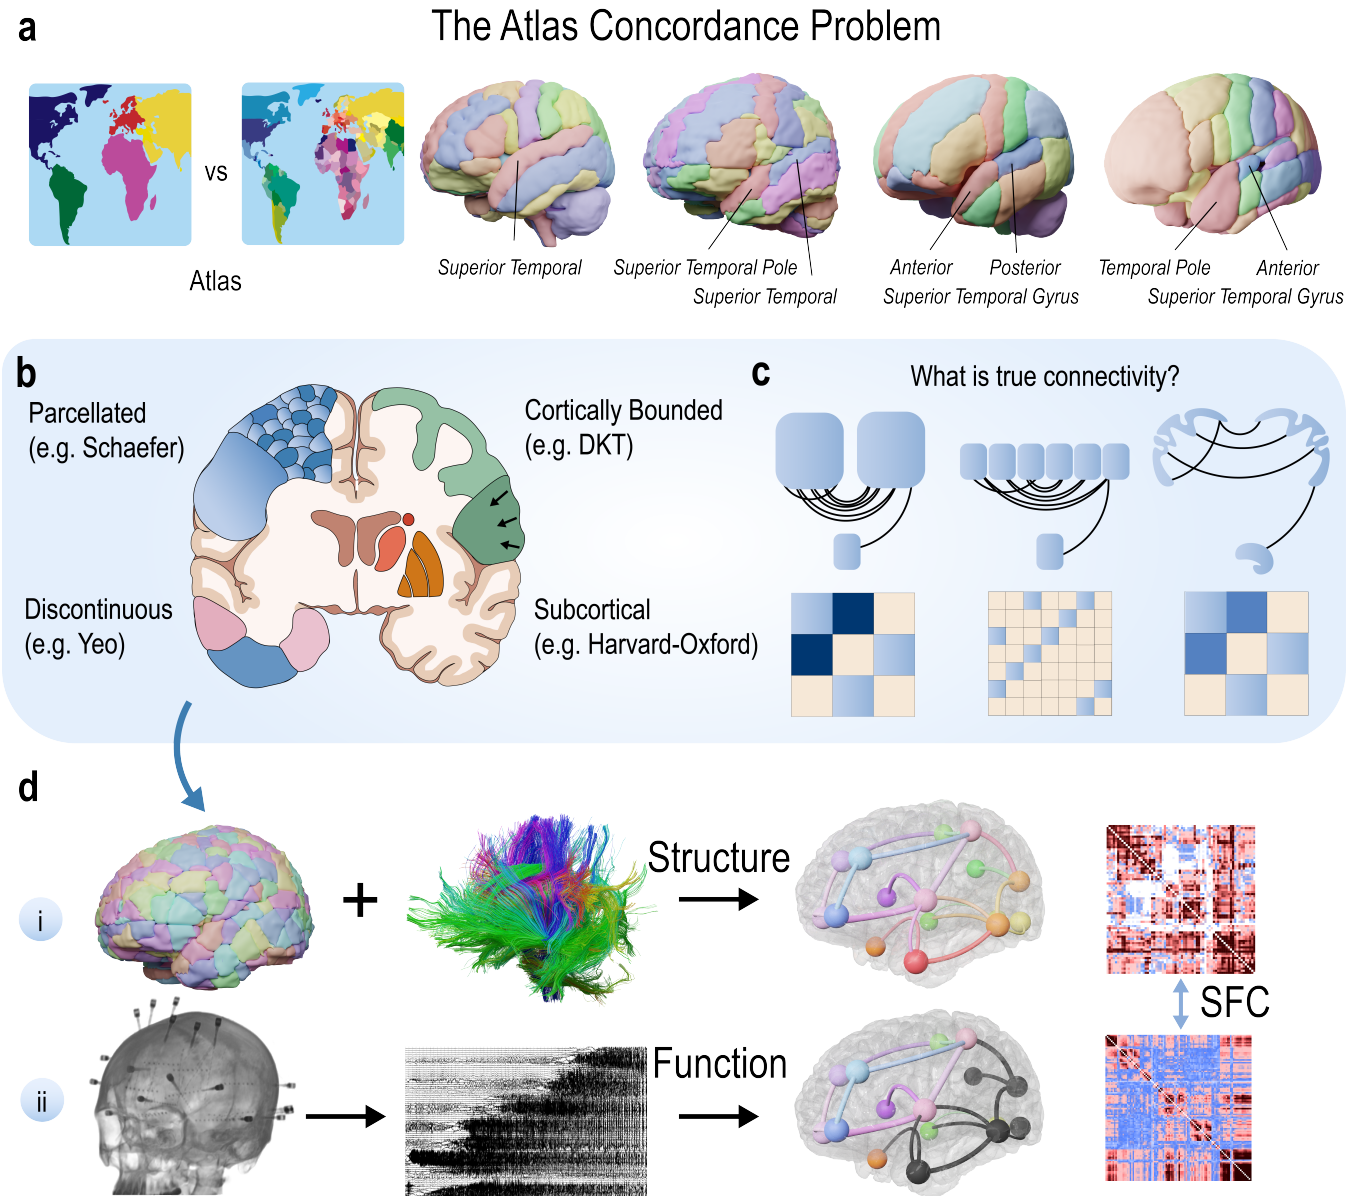

**Fig. 1. The Atlas Concordance Problem and SFC.** | **a**, In common usage, an atlas refers to a “collection of maps”<sup>10</sup> that defines geo-political boundaries. They may include coarse continental borders, fine state borders, or mesoscale country borders. Although borders<sup>11</sup> are usually consistent across atlases of the world, they are typically not consistent across atlases of the brain. Four separate atlases (left-to-right: CerebrA, AAL, Hammersmith, Harvard-Oxford) may define the superior temporal gyrus differently. The lack of consistency across these labels poses a problem for reproducibility in cognitive, systems, developmental, and clinical studies, as well as meta-analyses describing the involvement of different regions of the brain of various diseases<sup>4</sup>. This challenge has been previously referred to as the Atlas Concordance Problem. **b**, Atlases can have varying features (see also Table 1). **c**, The varying definitions of anatomical areas decreases confidence that all current connectivity studies reflect some fundamentally “true” architecture. **d**, When combined with white matter tracts reconstructed from diffusion MRI, atlases can be used to measure how different regions of the brain are structurally connected (i). Similarly, intracranial EEG (iEEG) implants can record neural activity to measure how different regions of the brain are functionally connected (ii). The statistical similarity between structural and functional connectivity measurements can be calculated (e.g., structure-function correlation; SFC), and such estimates have recently been used to better understand the pathophysiology of disease.

59 tigate hypotheses about the structure-function relationship  
60 in epilepsy patients. We found parcellation scale affects the  
61 measurement of resting-state SFC (rsSFC) and the change in

SFC ( $\Delta$ SFC) at seizure onset, potentially altering conclusions  
about how seizures harness the underlying structural scaffold  
in the brain supported in prior research<sup>23–26</sup>.

62  
63  
64

| Atlas [regions]          | Sources          | 3D Render | Description                                                                                                                                                                                                                                                                  | Variations                                                                                                                             |
|--------------------------|------------------|-----------|------------------------------------------------------------------------------------------------------------------------------------------------------------------------------------------------------------------------------------------------------------------------------|----------------------------------------------------------------------------------------------------------------------------------------|
| AAL [116;120;166]        | 1-7 SPM          | <b>S</b>  | Structural atlas. Manual identification using a defined labeling protocol on single subject template (Collin-27). Three versions. Version 2: updated boundaries. Version 3: further parcellations. Successor to Talairach.                                                   | AAL: AAL1, AAL2, AAL3, AAL600, AAL-JHU<br>                                                                                             |
| AICHA [384]              | 8                | <b>F</b>  | Functional atlas based on rsfMRI; 281 subjects. Each ROI has (1) homogeneity in its functional activity (2) a homotopic contralateral counterpart with which it has maximal connectivity.                                                                                    |                                                                                                                                        |
| Brainnetome [246]        | 9-10 DSIsudio    | <b>S</b>  | Connectivity-based parcellation. Based on idea that clustered regions of a brain region should share similar connectivity profiles; 40 subjects from HCP dataset. 210 cortical; 36 subcortical.                                                                              |                                                                                                                                        |
| Brodmann [48]            | 11-13 MRICron    | <b>S</b>  | Developed by independent group at Washington University in St. Louis. Published with MRICron software. Warned by developer to be used with caution - not validated, nor based on multiple individuals.                                                                       |                                                                                                                                        |
| CerebrA [102]            | 14               | <b>S</b>  | Structural atlas. Non-linear registration of cortical and subcortical labeling from Mindboggle-101 dataset (see DKT below) to the symmetric MNI-ICBM2009c template, followed by manual editing.                                                                              | Craddock: N parcellations<br>N=200  N=400  1.7 cm  1.0 cm  pea                                                                         |
| Craddock [N]             | 15-17            | <b>F</b>  | Functional atlas; rsfMRI; 41 subjects. ROIs are spatially clustered into regions of homogeneous functional connectivity. May be N regions. 200/400 regions publicly available. 4x4x4 mm <sup>3</sup> resolution fMRI. Resliced.                                              |                                                                                                                                        |
| DKT [111]                | 18-23 Freesurfer | <b>S</b>  | DKT is a labelling protocol. Used on Mindboggle-101 dataset (101 brains). Probabilistic atlas created using joint fusion algorithm. Surface version in Freesurfer. Volumetric version uses 20 brain subset. Noncortical regions: Neuromorphometrics BrainCOLOR atlas.        | Harvard-Oxford: Cortical/subcortical only, combined, symmetric, nonsymmetric<br>                                                       |
| Gordon-Petersen [333]    | 24-25            | <b>F</b>  | Identification of abrupt transitions in resting-state functional connectivity to identify parcellations. Based on rsfMRI. 108 subjects. Intended for surface-based analyses.                                                                                                 |                                                                                                                                        |
| Hammersmith [83]         | 26-28            | <b>S</b>  | Manually identified 83 structures using defined labeling protocol; 30 subjects. Maximum probability map. First version in 2003 with 49 structures. Named after London hospital, Hammersmith. Hammers is author.                                                              |                                                                                                                                        |
| Harvard-Oxford [48 + 21] | 29-30 FSL        | <b>S</b>  | Manual segmentation using defined labelling protocol; 37 subjects. Cortical and subcortical atlases provided separately. Left and right structures have same labels (symmetry). Must preprocess.                                                                             |                                                                                                                                        |
| JHU [48, 20]             | 31-33 FSL        | <b>S</b>  | White matter atlas. Two versions. (1) Labels: Hand segmentation average of diffusion MRI; 81 subjects. (2) Tracts: probabilistic identification from deterministic tractography; 28 subjects.                                                                                | JHU: Labels, tracts<br>                                                                                                                |
| Julich [121]             | 34-35 FSL        | <b>S</b>  | Cytoarchitecture atlas. Successor to Brodmann. Average of 10-subject post-mortem cyto- and myelo-architectonic segmentations. Update to the Eickhoff SPM Anatomy Toolbox v1.5. Whole brain is not covered.                                                                   |                                                                                                                                        |
| MMP [380]                | 36-38 DSIsudio   | <b>M</b>  | Multi-modal parcellation: (1) Architecture - T1w/T2w myelin maps + cortical thickness, (2) function - task-fMRI, (3) connectivity, (4) topography, 210 subjects. Cortical ONLY. Originally intended for surface analysis. Volumetric version independently created and used. | Random: N parcellations, cortical, whole-brain, subparcellated<br>N=10  N=100  N=1,000  N=10,000<br>lemon 5 cm  grape 2 cm  + pea 1 cm |
| Random [N]               | 39-40            | <b>V</b>  | Brain is randomly parcellated into N regions. Variations used in studies include cortical and whole-brain. Other atlases (e.g. AAL) and their regions may be further randomly divided, or subparcellated.                                                                    |                                                                                                                                        |
| MNI Structural [9]       | 41 FSL           | <b>S</b>  | 9 regions, including lobar and some subcortical regions. Hand segmented 50 subjects. Transformed into MNI152 space, averaged, probability maps produced. 25% max probability is shown.                                                                                       | Schaefer: 100 to 1,000 parcellations (by 100), named to Yeo 7 and 17<br>N=100  N=500  N=1,000                                          |
| Schaefer [100-1000]      | 42-43 Github     | <b>F</b>  | Based on rsfMRI. Clusters found with gradient-weighted Markov Random Field model. 1489 subjects. Cortical only. Spatial resolutions provided: 100 - 1000 parcellations (by 100). Well documented.                                                                            |                                                                                                                                        |
| Talairach [1105]         | 44-48 FSL        | <b>S</b>  | Conversion of original Talairach labeling. Digitized version of the original (coarsely sliced) Talairach atlas and registration to MNI 152 space. Atlas provided in FSL.                                                                                                     | Yeo: 7/17 parcellations; Cortically bounded or liberal<br>                                                                             |
| Yeo [7; 17]              | 49-50 Freesurfer | <b>F</b>  | 1000 subjects; rsfMRI. Clustered cortical regions by pattern of functional connectivity. Results in non-spatially continuous clusters. 7 and 17 clusters based on stability of clustering algorithm.                                                                         |                                                                                                                                        |
| Region-specific          | 41-54 FSL        | <b>V</b>  | Atlases created for specific regions, usually high quality + high degree of accuracy (e.g. post-mortem histological verification). Examples: Thalamus nuclei, hippocampus, and other specific structures.                                                                    | Thalamus, Hippocampus, Cerebellum<br>                                                                                                  |
| Population-specific      | 55-56            | <b>V</b>  | Atlases created from a specific population (e.g. elderly, pediatric, non-human). Disease-specific defines regions specific for disease (e.g. MS lesion probabilistic locations).                                                                                             | Pediatric, Elderly, Disease specific<br>Neonatal<br>M-CRIB (Melbourne)<br>                                                             |

**Table 1. Atlases.** | Refer to [Table S1](#) for atlas sources. NIFTI files converted to STL files with Slicer and 3D rendered in Blender. **S**: Structurally defined atlas; **F**: Functionally defined atlas; **M**: Multi-modally defined atlas; **V**: A variably defined atlas that may be structural, functional, multi-modal; **rsfMRI**: resting-state fMRI; **ROI**: region of interest; **HCP**: Human connectome project dataset<sup>19</sup>; **DKT**: Desikan-Killiany-Tourville protocol<sup>1</sup>; **MS**: multiple sclerosis.

65 Through the lens of our disease system, we conclude with a  
66 new framework for evaluating atlases by expanding historical  
67 foundations for assessing the validity and effectiveness of animal  
68 models<sup>27</sup>, network models<sup>28</sup>, and psychometric tests<sup>29</sup>.  
69 A one-size-fits-all approach may not nor should exist<sup>30</sup>. In-

stead, we hope to critically evaluate an atlas by maximizing its  
(1) descriptive, (2) explanatory, and (3) predictive validity<sup>28</sup>  
in relation to the experimental system at hand. In epilepsy  
specifically, we aim to select an atlas that resembles the system  
in which we work (**descriptive validity**). Importantly,

## Atlas Morphology: Sizes and Shapes

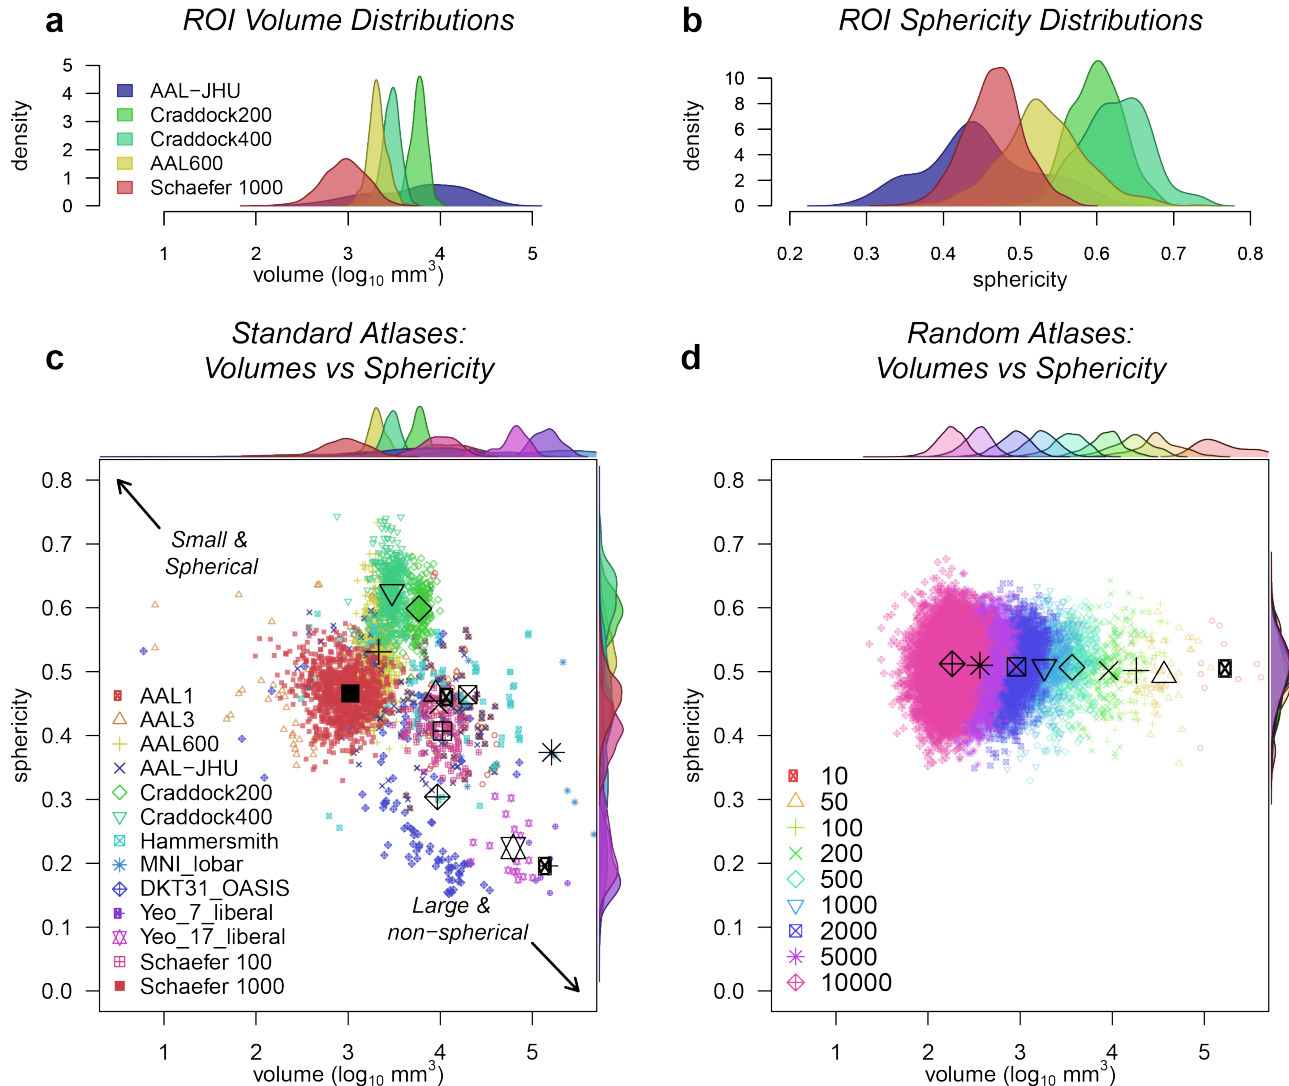

**Fig. 2. Atlas morphology: sizes and shapes.** | **a**, Volume distribution of atlas parcellations or region of interests (ROIs) demonstrating the diversity of parcellation sizes. Some atlases have wide distributions, while others have low variability in parcellation sizes. **b**, Parcellation sphericity distributions illustrating how the shapes of different parcellations may not be uniform. Colors denoting atlases are the same in **a**. **c**, Volumes versus sphericity showing how some atlas parcellations may be small and spherical, while others may be large and non-spherical. This illustrates the non-uniformity in atlas parcellations. We hypothesize that this variability contributes to altered network structure and measurement of SFC. **d**, Volumes and sphericity of random atlases showing the uniformity of sphericity with changing volumes. This allows us to study the effect of parcellation scale on network characteristics and SFC without the confound of shape effects. Numbers in legend represent the number of parcellations for each random atlas. Remaining atlases are in Fig. S2. See Table S1 for atlas descriptions.

75 it should include coverage of subcortical structures typically  
 76 involved in epilepsy networks with a parcellation scale that is  
 77 not too coarse nor fine to model connectivity at the appropriate  
 78 scale (given the resolution limits of HARDI and SEEG).  
 79 Next, we want to select an optimal atlas that can be used  
 80 for hypothesis testing (**explanatory validity**). It should include  
 81 the capability to test how functional changes seen in  
 82 epilepsy are related to the underlying structural connectivity.

Explanatory validity thus requires assessment of both the atlas  
 features (a form of descriptive validity) and its ability to test  
 for causal relationships. Finally, we strive to maximize the predictive  
 capability of an atlas (**predictive validity**). We aim  
 to optimally predict functional changes seen in epilepsy using  
 noninvasive structural neuroimaging, lessening the need for  
 costly and invasive implantations in epilepsy patients. Later,  
 we show some atlases at a particular scale are not able to pre-

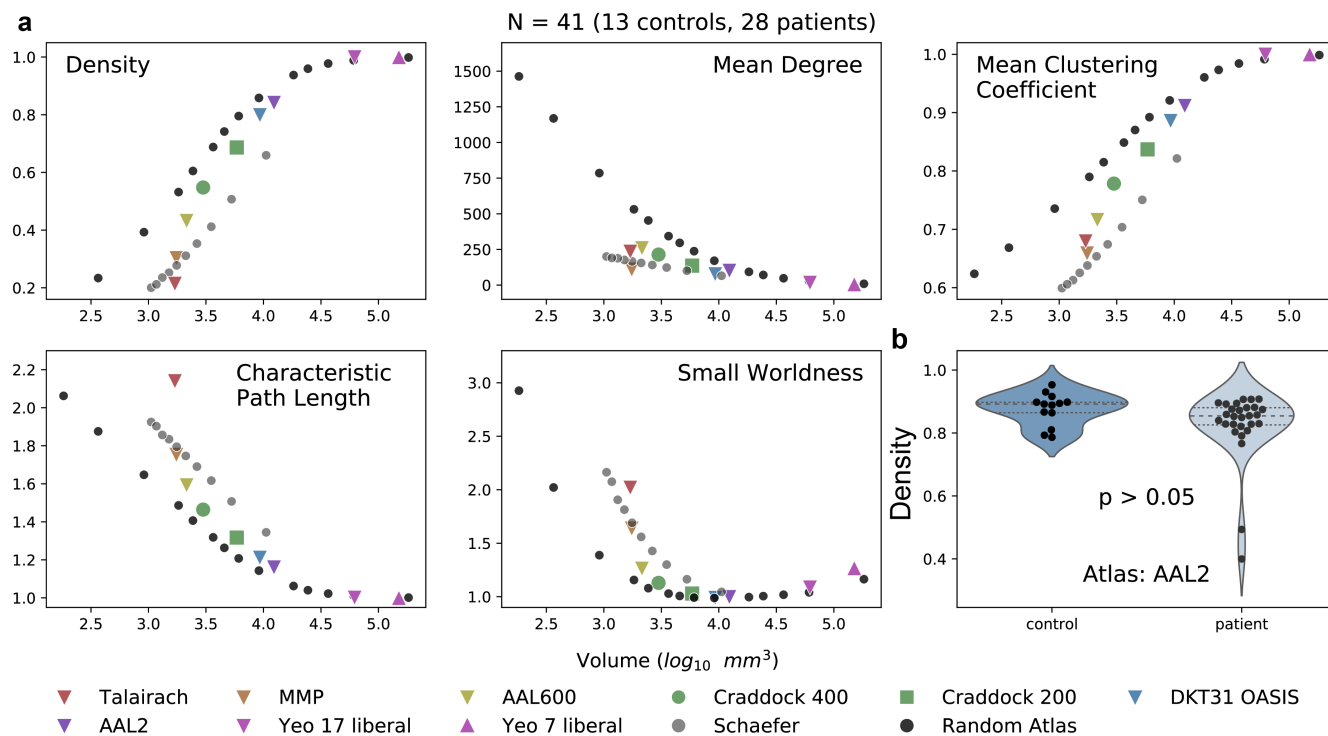

**Fig. 3. Network differences between atlases.** | **a**, Density, mean degree, mean clustering coefficient, characteristic path length, and small worldness were calculated for all atlases. A subset of atlases is shown. Remaining atlases studied are shown in Fig. S3. The average parcellation volume was calculated for each atlas and the corresponding network measure was graphed as the mean of all subjects (N=41; 13 controls, 28 patients). Because many basic network measures change as a function of parcellation volume, we hypothesized that SFC would also change based on parcellation volume. **b**, Controls and patients were not significantly different in density for the AAL2 atlas (Mann-Whitney U test) illustrating global structural network measures are similar between cohorts. Specific connectivity differences between cohorts were not explored (e.g. to explore if connections from the hippocampus to the cingulate gyrus are changed in temporal lobe epilepsy) and out of the scope of this manuscript. Controls and patients were separated and shown in Fig. S4. See Table S1 for atlas descriptions.

91 dict structure-function changes with seizure onset. With this  
 92 framework, the present study demonstrates the set of atlases  
 93 with specific features such as parcellation size, shape, and  
 94 coverage that meet our goal of predicting functional changes  
 95 seen in epilepsy. Not all atlases are valid for a specific study.  
 96 Our generalized framework provides a valuable resource for  
 97 others to make an educated decision in regards to atlas choice  
 98 when designing their study.

## 99 Results

100 **Clinical Data.** Forty-one individuals (mean age  $34 \pm 11$ ; 16  
 101 female) underwent High Angular Resolution Diffusion Imaging  
 102 (HARDI), composed of thirteen controls (mean age  $35 \pm 13$ ;  
 103 6 female) and twenty-eight drug-resistant epilepsy patients  
 104 (mean age  $34 \pm 11$ ; 12 female) evaluated for surgical treatment.  
 105 Of the twenty-eight patients, twenty-four were implanted with  
 106 stereoelectroencephalography (SEEG) and four with electro-  
 107 corticography (ECoG). Ten SEEG patients (mean age  $34 \pm 8$ ;  
 108 4 female) had clinical seizure annotations, and the first seizure  
 109 from each patient (mean duration 81s) without artifacts was  
 110 selected for SFC analyses. Patient and control demographics  
 111 are included in Table S2.

**Atlas Morphology: Sizes and Shapes.** We hypothesized that  
 atlas morphological properties, including size and shape, affect  
 SFC. To test this hypothesis, we first quantified the distribu-  
 tions of parcellation sizes and shapes in various atlases (Fig 2).  
 Some atlas parcellations have narrow volume distributions  
 (Fig 2a, e.g. Craddock 200 and 400 atlases), while others have  
 wider parcellation volume distributions (e.g. Schaefer 1000).  
 Several atlases that have larger parcellation volumes may have  
 lower sphericity values (Fig 2b). These results exemplify the  
 diversity of atlas parcellation morphology. Fig 2c shows a  
 comparison of individual parcellation volumes and sphericities.  
 The remaining atlases are shown in Fig. S2. In contrast to  
 standard atlases, random atlases have constant sphericity with  
 respect to a change in volume size. Although random atlases  
 may not represent true anatomical or functional boundaries,  
 the benefit is that the shape of a parcellation is uniformly  
 biased regardless of parcellation size; random atlases allow  
 us to study how parcellation scale affects network structure  
 and SFC while keeping the effect of shape constant. They  
 also allow us to explore if accurate and precise anatomical  
 boundaries are crucial for our experimental system.

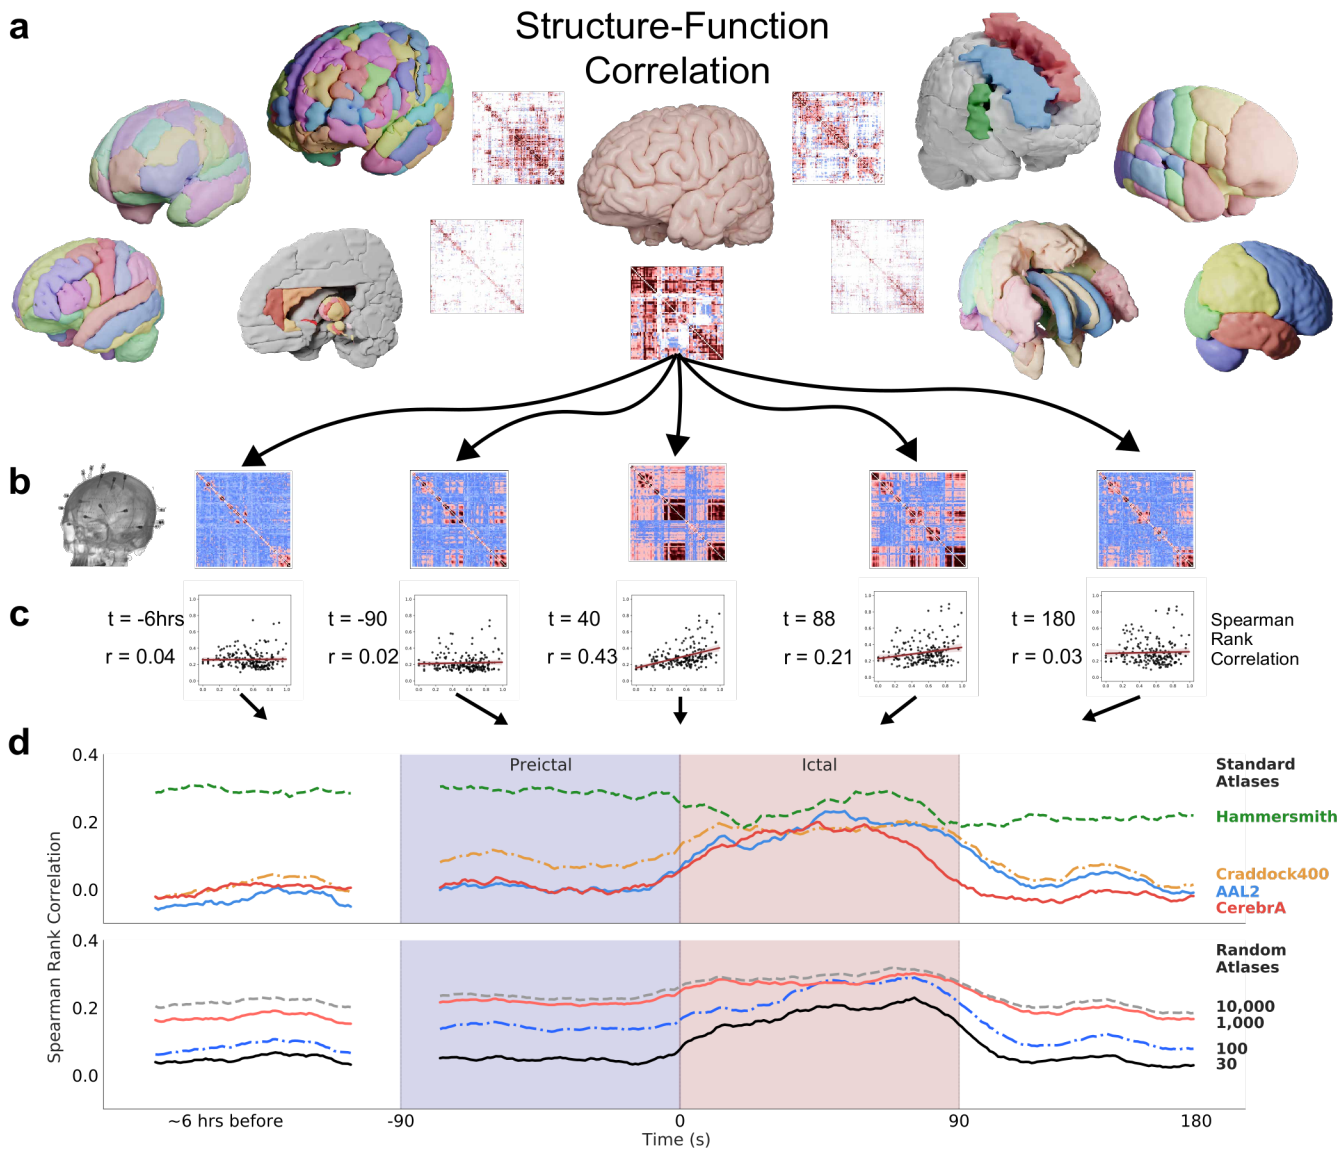

**Fig. 4. Structure-Function correlation in a single patient.** | **a**, Example atlases and structural adjacency matrices. **b**, Functional adjacency matrices are produced from the analysis of SEEG recordings during the interictal, preictal, ictal, and postictal periods. Broadband cross correlation matrices are shown for a single patient RID0278 at 6 hours before seizure onset, 90 seconds before seizure onset, 40s after seizure onset ( $t = 40$ ), 88 seconds after seizure onset (seizure duration = 89 seconds), and 180 seconds after seizure onset (or 91 seconds after seizure termination). **c**, Each functional adjacency matrix is correlated to a structural adjacency matrix of a given atlas. A plot of the structural edge weights and corresponding functional edge weights is shown for the example time points of **b**. Spearman Rank Correlation is measured between all time points and all atlases for each patient. **d**, SFC is graphed at each time point for four example standard atlases (Hammersmith, Craddock400, AAL2, and CerebrA), and four example random whole-brain atlases (30, 100, 1000, and 10000 parcellations). SFC increases during seizure state for several standard atlases – Craddock 400, AAL2, and CerebrA atlases. This result follows previous SFC publications with ECoG<sup>23,24</sup>. However, SFC does not increase for the Hammersmith atlas. These findings highlight inference from one type of atlas may suggest that seizure activity is not correlated to brain structure, contradicting previous studies. Similarly, SFC increases for a subset of random whole-brain atlases. See [Table S1](#) for atlas descriptions.

133 **Anatomical definitions affect network topology.** Although the  
134 morphology of atlas parcellations is diverse, we aimed to investigate  
135 how these morphological characteristics affect network  
136 topology, particularly how parcellation scale affects network  
137 structure [Fig. 3](#). Networks are the basis upon which we com-

pute SFC, and not necessarily morphological characteristics, therefore, we measured how network density, mean degree, characteristic path length, mean clustering coefficient, and small worldness change as a function of parcellation scale ([Fig. 3a](#)). We found that the change in these network mea-

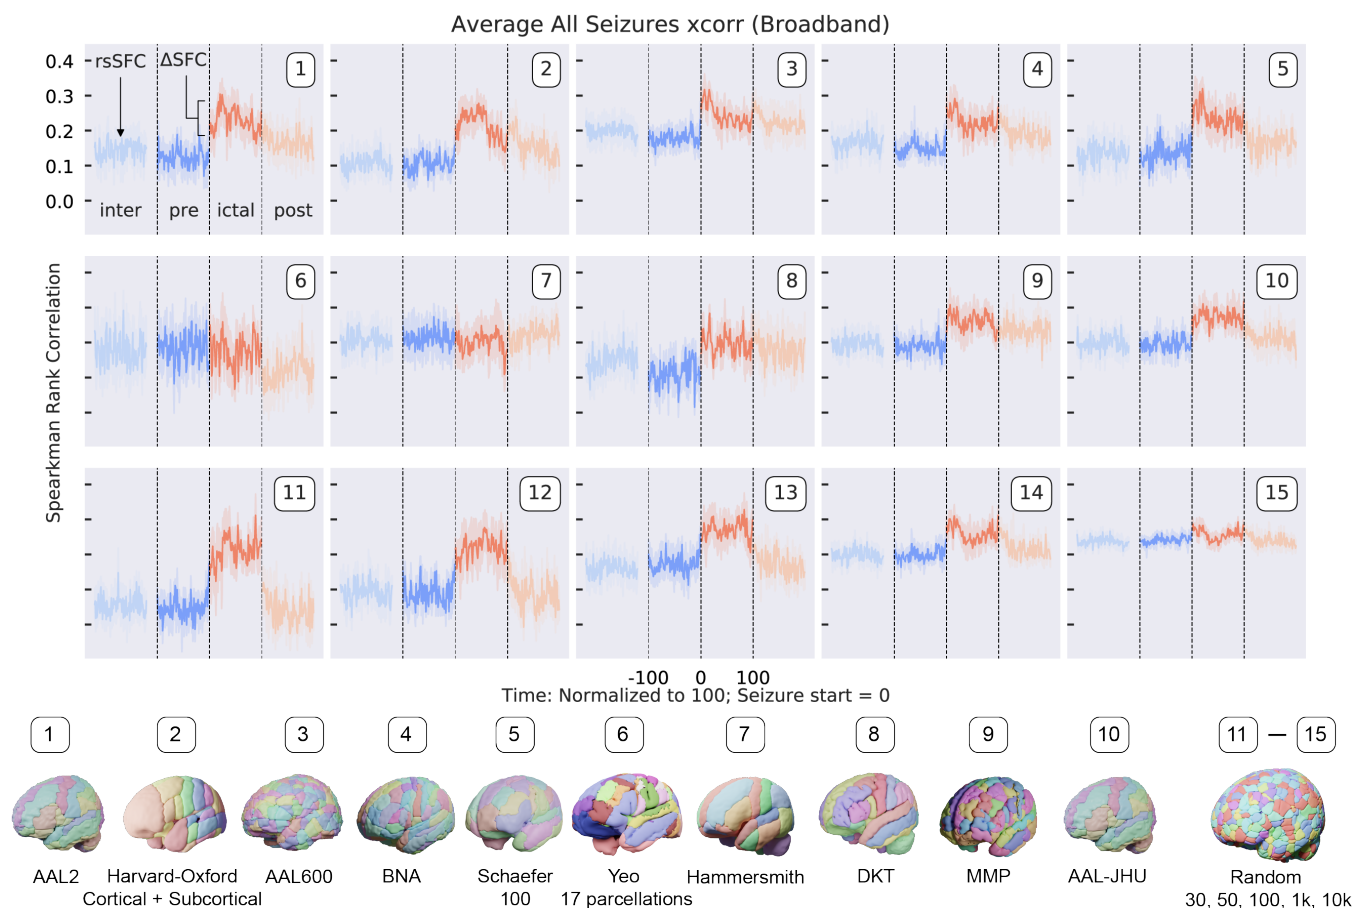

**Fig. 5. Structure-Function Correlation in multiple patients.** | SFC for ten standard atlases and five random atlases using SEEG broadband cross-correlation metrics averaged across all patients with clinically annotated seizures ( $N = 10$ ). Resting state SFC (rsSFC) is the SFC during the interictal period. We observe that rsSFC increases with decreasing parcellation volume (see also Fig. 6a). The AAL2 atlas shows a statistically significant increase in SFC from preictal to ictal periods ( $p = 0.02$  by Wilcoxon signed rank test after Bonferroni correction for 52 tests). The change from preictal to ictal SFC is  $\Delta$ SFC. This finding supports the hypothesis that seizure activity harnesses the underlying structural connectivity of the brain. SFC was similarly calculated for random whole-brain atlases. These findings may be concerning given that the *inherent* structure-function relationship in the brain is not necessarily changing at resting state, but its measurement is greatly affected by atlas choice alone. These results highlight the crucial need for critically evaluating the appropriate atlas to understand SFC across the neuroscience literature, especially in an SEEG setting given the rise of SEEG implantations<sup>30</sup>. **xcorr**: cross correlation. See Table S1 for atlas descriptions.

143 sures are congruent between standard and random atlases and  
 144 previous studies<sup>31</sup>. For example, density and mean clustering  
 145 coefficient increase as a function of increasing average parcellation  
 146 volume for both the standard and random atlases, while  
 147 characteristic path length and small worldness decrease. We  
 148 also show that mean density, a global network measure, is similar  
 149 between our control ( $N=13$ ) and patient ( $N=28$ ) cohorts  
 150 (Fig. 3b). As a result of these findings, we hypothesized that  
 151 SFC would also change based on parcellation volume.

152 **Anatomical definitions affect SFC.** Fig. 4 illustrates an  
 153 overview of how SFC is calculated. Structure is measured  
 154 with high angular resolution diffusion imaging (HARDI) and  
 155 function is measured with SEEG electrode contacts. Structural  
 156 adjacency matrices are generated based on the atlas  
 157 chosen (Fig. 4a) and functional adjacency matrices are gen-

158 erated based on broadband (1 – 128 Hz) cross-correlation of  
 159 neural activity between the electrode contacts (Fig. 4b). The  
 160 adjacency matrices shown are example data from a single patient,  
 161 RID0278. Functional adjacency matrices for RID0278  
 162 are shown for 6 hours before seizure onset, 90 seconds before  
 163 seizure onset ( $t = -90$ ), 40 seconds after seizure onset ( $t = 40$ ),  
 164 88 seconds after seizure onset (seizure duration = 89 seconds),  
 165 and 180 seconds after seizure onset (91 seconds after seizure  
 166 termination). Each functional adjacency matrix was correlated  
 167 to each structural adjacency matrix, yielding a SFC at each  
 168 time point (Fig. 4c). Each point represents the normalized  
 169 structural edge weight between two brain regions and their  
 170 corresponding functional connectivity edge weight in broadband  
 171 cross-correlation. A line of best fit is shown, and  $r$  values  
 172 represent Spearman rank correlation for that time point. SFC  
 173 was graphed for all time points during the interictal, preictal,

## rsSFC and $\Delta$ SFC

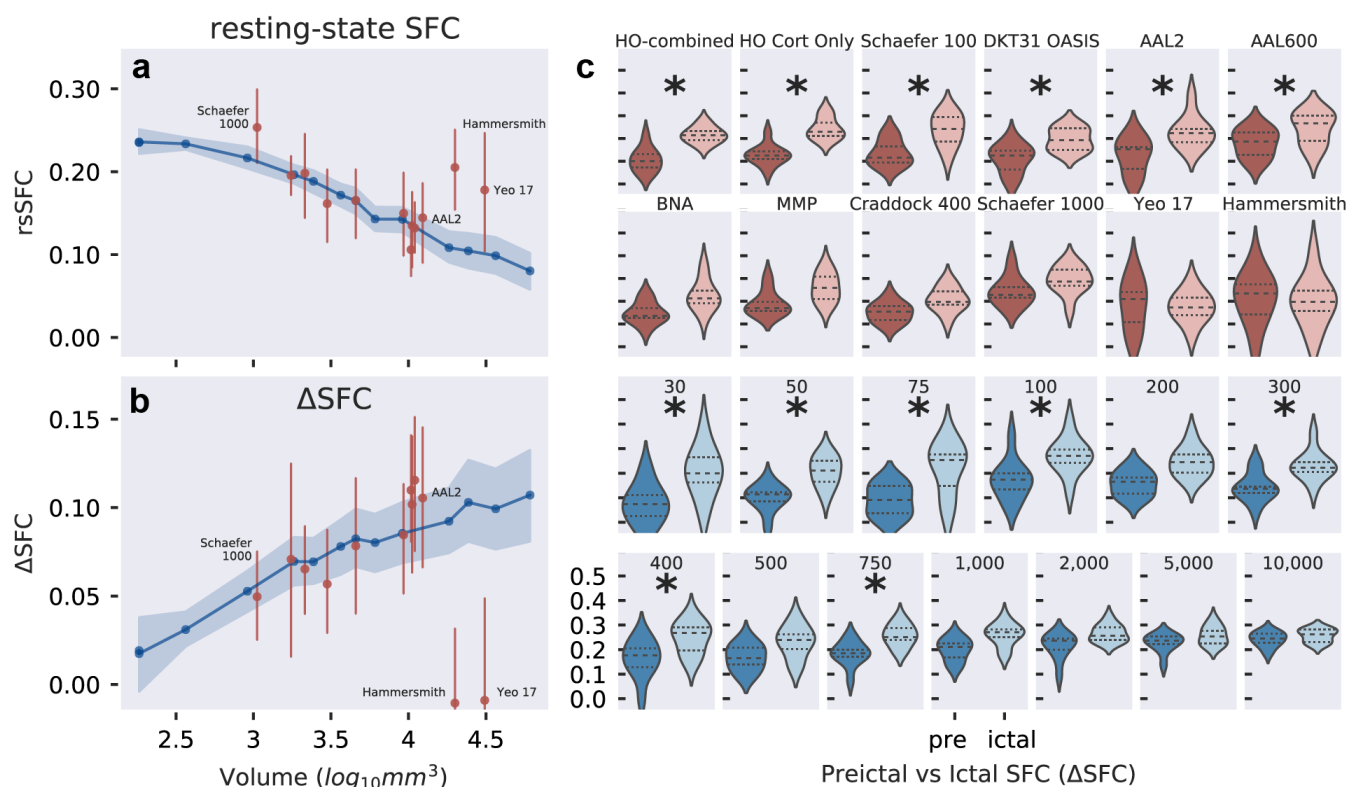

**Fig. 6. A trade-off between resting-state SFC (rsSFC) and the change in SFC ( $\Delta$ SFC) with neuroanatomical scale.** | **a**, rsSFC increases at smaller parcellation scales. Random atlases are shown in blue and standard atlases are shown in red. Bands represent 95% confidence intervals. **b**,  $\Delta$ SFC decreases at smaller parcellation scales. Broadly,  $\Delta$ SFC may be interpreted as the change in SFC with respect to disease (e.g. seizure, schizophrenia, major depressive disorder) and non-disease states, and this change has been used to characterize and make inferences on many neurological diseases. These results exemplify that either too coarse or too fine parcellations may not adequately capture the underlying SFC of the brain or its dynamics with relation to neurological disease. **c**, A subset of atlases capture the dynamical change in SFC. The Harvard-Oxford (HO) and DKT atlases show a significantly different SFC between preictal and ictal periods ( $p < 0.05$  by Wilcoxon signed rank test after Bonferroni correction for 52 tests) while the Brainnetome and MMP atlases do not ( $p > 0.05$ ). Larger parcellation volumes (e.g.  $N = 30$ ) increase in  $\Delta$ SFC from smaller parcellation volumes (e.g.  $N = 1,000$ ), indicating that larger parcellation volumes adequately capture  $\Delta$ SFC. However, parcellation volume is not the only factor in adequately capturing  $\Delta$ SFC. The Hammersmith atlas with large parcellation volumes and larger electrode coverage is not able to capture a significant  $\Delta$ SFC ( $p > 0.05$ ). Asterisks represent atlases with statistically significant differences in SFC between ictal and preictal periods after Bonferroni Correction. See [Table S1](#) for atlas descriptions.

174 ictal, and postictal periods for this patient in [Fig. 4d](#).

175 Four example standard and random atlases are graphed.  
 176 We show that SFC increases during the ictal state for many  
 177 atlases (CerebrA, AAL2, Craddock 400), but not all atlases  
 178 (Hammersmith). The increase in SFC during seizures follows  
 179 previous SFC publications with ECoG<sup>23,24</sup>. Similarly, SFC  
 180 increases for a subset of random whole-brain atlases. The ran-  
 181 dom whole-brain atlases were created to change parcellation  
 182 scale while preserving shape, therefore, these data support that  
 183 SFC is affected by parcellation scale. However, parcellation  
 184 scale is not the only feature affecting SFC – the Hammersmith  
 185 and AAL2 atlases have similar parcellation scales yet diverging  
 186 neuroanatomical properties and SFC dynamics. These findings  
 187 highlight inference from one type of atlas may suggest that  
 188 seizure activity is not correlated to brain structure, contradict-

189 ing previous studies<sup>23</sup>. Broadly, structural network studies  
 190 and conclusions may be affected by the atlas chosen, and thus  
 191 care must be taken when interpreting the structure-function  
 192 relationship of the brain with respect to neuroanatomical def-  
 193 initions.

194 **Structure-Function Correlation at a Population Level.** [Fig. 5](#)  
 195 shows SFC for ten standard atlases and five random atlases  
 196 using SEEG broadband cross-correlation metrics averaged  
 197 across all patients with clinically annotated seizures ( $N = 10$ ).  
 198 Functional connectivity measurements were also calculated for  
 199 coherence, zero time-lag Pearson, and Spearman rank  
 200 correlations across multiple frequency bands. They are included  
 201 in the freely available, curated, and opensource dataset for  
 202 all readers of this manuscript (see methodology section for



## A New Framework for Choosing a Valid Atlas

### a Descriptive Validity

Does the atlas resemble the system?

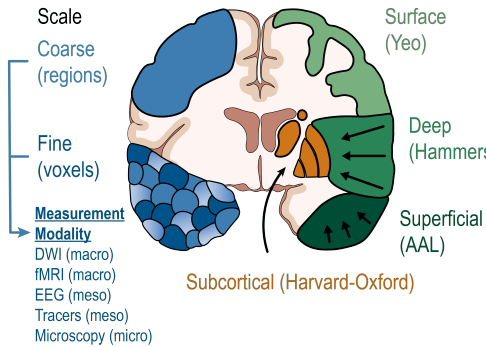

### b Explanatory Validity

Can the atlas be used for hypothesis testing?

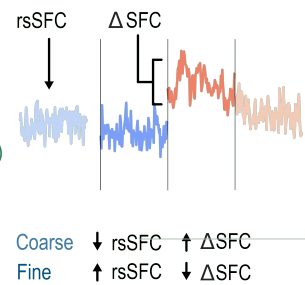

### c Predictive Validity

Can the atlas be used for prediction?

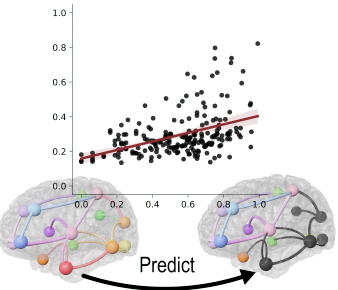

### d Atlas Features

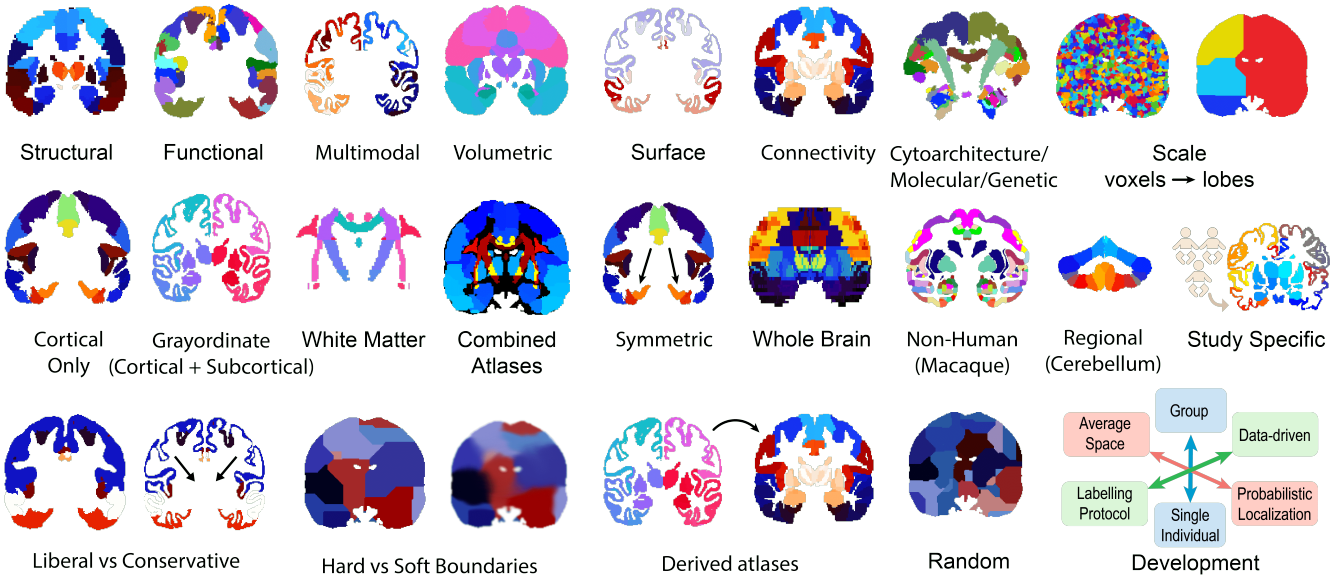

**Fig. 7. Framework for selecting a brain atlas.** | **a**, Descriptive validity of an atlas addresses the “face value” of an atlas (it resembles the experimental system). In epilepsy, an atlas should cover subcortical structures involved in seizure generation. It should have a parcellation scale not too coarse nor fine to model connectivity at the appropriate scale given the resolution limits of HARDI and SEEG. **b**, Explanatory validity of an atlas addresses whether an atlas can be used for testing causal relationships. In epilepsy, it includes the capability to test how functional changes seen in epilepsy are related to structural connectivity. **c**, Predictive validity addresses the predictive capability of an atlas. In epilepsy, we want to be able to predict functional epileptic changes using noninvasive neuroimaging, lessening the need for costly and invasive implantations. **d**, Non-mutually exclusive atlas features related to descriptive validity. Atlases may be derived from structural, functional, or multimodal datasets; parcellations can be random. Atlases may be volumetric or surface-based, made from connectivity data (structural/functional), derived from microscopic datasets such as cytoarchitecture, molecular, and genetic. Parcellations may range from voxels to entire lobes, have different brain coverages (cortical, “grayordinate”, white matter, or whole brain), may be combined, and have symmetric labeling. Atlases may be non-human, incorporate highly detailed maps of specific regions, and be made from the study participants. Parcellations may include liberal/conservative and hard/soft boundaries. Atlases can be derived and further parcellated from other atlases. Finally, atlases may be developed through different methodologies with further details in the text.

203 links); however, they were not used in directed hypothesis  
 204 testing about specific frequency bands nor about other func-  
 205 tional measurements in the present study. The AAL2 atlas

shows a statistically significant increase in SFC from preictal to ictal periods ( $p < 0.05$  by Wilcoxon signed rank test  
 after Bonferroni correction for 52 tests). The change from

206  
 207  
 208

preictal to ictal SFC is denoted  $\Delta$ SFC. This finding supports the hypothesis that seizure activity harnesses the underlying structural connectivity of the brain<sup>23,24</sup>. SFC was similarly calculated for random whole-brain atlases. A notable finding is that during the interictal period, resting state SFC (rsSFC) increases at larger number of parcellations (i.e. smaller parcellation volumes). We show that rsSFC is observably affected by parcellation scale when inspecting the random atlases in Fig. 5 (bottom row).

These findings may be concerning given that the *inherent* structure-function relationship in the brain is not necessarily changing at resting state, but its measurement is greatly affected by atlas choice alone. These results highlight the crucial need for critically evaluating an appropriate atlas, particularly by maximizing explanatory validity. We aim to maximize our ability to test hypotheses and draw conclusions about structure-function relationship within the brain at seizure onset. This is especially important in an SEEG setting given the rise of SEEG implantations worldwide; it allows for sampling of cortical and subcortical structures across both hemispheres with reduced morbidity and higher tolerance for patients<sup>32</sup>.

**rsSFC vs  $\Delta$ SFC.** Resting state SFC (rsSFC) and the change in SFC ( $\Delta$ SFC) from preictal to ictal periods are differentially affected by parcellation scale (Fig. 6). Fig. 6a shows how rsSFC increases at smaller parcellation scales. In contrast, Fig. 6b shows how  $\Delta$ SFC decreases at smaller parcellation scales. Broadly,  $\Delta$ SFC may be interpreted as the change in SFC with respect to disease (e.g. seizure, schizophrenia, major depressive disorder) and non-disease states. This change metric has been used to characterize and make inferences in many neurological disorders<sup>33,34</sup>. These results exemplify that either overly coarse or fine parcellations may not adequately capture the underlying SFC of the brain or its dynamics with relation to neurological disease (low explanatory validity in our framework below).

A subset of atlases can capture the dynamical change in SFC (Fig. 6c). For example, the Harvard-Oxford (HO) and DKT atlases show a significantly different SFC between preictal and ictal periods ( $p < 0.05$  by Wilcoxon signed rank test after Bonferroni correction for 52 tests) while the Brainnetome and MMP atlases do not ( $p > 0.05$ ). Larger parcellation volumes (e.g.  $N = 30$ ) result in an increase in  $\Delta$ SFC compared to smaller parcellation volumes (e.g.  $N = 1,000$ ), indicating that larger parcellation volumes adequately capture  $\Delta$ SFC. However, parcellation volume is not the only factor in optimally capturing  $\Delta$ SFC. The Hammersmith atlas with large parcellation volumes and larger electrode coverage (Supplementary Fig. 4) is not able to capture a significant  $\Delta$ SFC ( $p > 0.05$ ).

## Discussion

In this study, we performed a comprehensive evaluation of the available structural, functional, random, and multi-modal atlases in the neuroscience literature (Table 1). We detailed morphological and network differences between these atlases and showed the effect of varying neuroanatomical definitions on the measurement of structure-function correlation (SFC) in epilepsy patients. We showed how the various atlases may alter conclusions about seizure dynamics. This work has wide implications for neuroscience labs utilizing such atlases

because some atlases produce different results and may alter predictions and conclusions we draw about the brain's function. Based on our study, we propose a general framework below for evaluating and selecting atlases (Fig. 7a-c) to direct future neuroscience work.

**A New Framework for Brain Atlases.** Various publications have highlighted the atlas concordance problem<sup>2-4,9</sup>, curated several atlases in freely accessible databases<sup>35,36</sup>, and have made arguments for why specific atlas features (Fig. 7d) may be valid or superior in certain situations<sup>17,30,37-41</sup>. Clearly, there have been great efforts to publish accurate and precise parcellations both in individuals and across populations as seen with an exponential rise in atlas-related publications over the last three decades (Fig. S6). However, none have found a general solution to the underlying problem: Does atlas choice matter? If so, how much? And are there atlas features important in certain situations or experimental designs? An argument can be made that in some cases, atlas choice may not matter to a great extent. For example, many atlases show similar results in Fig. 6. Interestingly random whole-brain atlases, which do not follow accurate anatomical or functional boundaries, show SFC changes at seizure onset in concordance with other common atlases used across neuroscience studies. We provide a general framework that allows us to determine if an atlas is valid, avoid testing large numbers of atlases at one extreme, and gives credence to the current standard of publishing results in the main text using a single atlas and, if deemed necessary, provide supplementary results using a different atlas (preferably one with different features). A one-size-fits-all standard parcellation may not nor should exist<sup>30</sup>.

Our framework evaluates the validity of an atlas to maximize its (1) descriptive, (2) explanatory, and (3) predictive validity<sup>28</sup> in relation to the experimental system. This framework is borrowed from the logic of assessing network models, and historically, animal models<sup>27,42</sup> and psychometric tests<sup>29,43</sup>, where assessment of these models with standard statistical model-selection methods is particularly challenging.

**Descriptive validity** of an atlas refers to an atlas that appropriately resembles the system in which we work. In other words, it has “face value”<sup>27</sup>. This includes atlas features (Fig. 7d) relevant to the study, for example, the inclusion of subcortical structures relevant to epilepsy. Without the inclusion of relevant features, an atlas may not allow for hypothesis testing or determination of causality (explanatory validity below). Importantly, descriptive validity of an atlas also relates to the modality scale we use to measure the brain – for example, DWI and fMRI at the macroscale<sup>44</sup>, iEEG and tracers at the meso scale<sup>45</sup>, and microscopy at the microscale<sup>46</sup>. It is important to select a parcellation scale that resembles the measurement modality resolution (Fig. 7a). When correlating DWI with iEEG in our study at larger parcellations, we lose our ability to discern precise anatomical locations that are structurally and functionally related. Furthermore, resting state structure-function relationship increases at larger parcellations even though the *inherent* structure-function relationship should remain constant (Fig. 5 and Fig. 6a). At the other end of the scale, we lose our ability to discriminate the differences in structure-function relationship at seizure onset at smaller parcellations (tending to the size of voxels). At voxel scales, other notable limitations include problems with

multiple comparisons, computational costs, (near) collinearity, and the introduction of noise with inaccurate alignment of individual subjects' data. Recommendations for performing voxel-level analyses versus larger node-based approaches are discussed in Bijsterbosch et al. 2017<sup>47</sup>.

Two additional atlas features highlighted here include (1) surface versus volumetric based atlases and (2) atlas development. Surface based registration may improve accuracy over traditional volumetric based approaches<sup>17</sup>, however, a limitation is that a large proportion of brain activity involves communication between cortical and subcortical regions and thus a surface-based approach is unlikely to provide a complete understanding of the brain<sup>47</sup>. Although the brain including the cortex, with six cytoarchitecturally defined layers, is fundamentally not a surface, we showed how surface based atlas features may not be as vital for consideration as features such as scale (Fig. 6c; Yeo, and DKT being surface-based and AAL and Harvard-Oxford being volumetric-based). A combination of surface cortical and sub-cortical gray matter regions, or "grayordinate"<sup>19</sup> atlases may be appropriate in some cases. Thus the atlas chosen relies on consideration of the experimental system. Finally atlases may have been developed through three non-mutually exclusive axes (Fig. 7d, bottom right): (1) using a single representative individual (Talairach) to a group of individuals (e.g. Hammersmith)<sup>3</sup>; (2) using a human labeling protocol (AAL) to a data-driven approach (e.g. Yeo); and (3) using a standard space representation such as in MNI coordinate space (Harvard-Oxford) to using a probabilistic mapping of the study participants (DKT in Freesurfer). The last approach where atlas labels are manually annotated and used as training classifiers to label the study participant brains is notably time consuming and is limited in use across studies<sup>38,48</sup>.

**Explanatory validity** of an atlas requires an assessment of both an atlas' architecture (a form of descriptive validity) and its ability to test for causal relationships<sup>28</sup>. In epilepsy, it includes the capability to test hypotheses on how functional changes are related to the underlying structural connectivity, if at all. Statistical testing, such as tests to determine if specific brain regions are significantly different from each other in controls and patients, and subsequent conclusions drawn from the use of an atlas is the focus of explanatory validity. With explanatory validity, the biases introduced into our results from using an atlas must also be acknowledged, which can alter our conclusions about neurobiology and pathophysiology. For example, some structural atlases have different anatomical labeling protocols (DKT, AAL, Hammersmith) which may introduce biases resulting from how large, small, or the exact anatomical landmarks were used to create such atlases. Data-driven atlases<sup>14,16,47</sup>, namely those created through functionally related brain regions, may also introduce biases based on the measurement modality or nodal definitions used (clustering, decomposition, gradient-based methods) and alter Type I or Type II error rates. In our study, we investigate whether seizures spread through the underlying connectome of the brain at the macro-scale level and if structural connectivity can be used to predict seizure spread. If seizures spread along the human connectome, but an atlas with >1,000 parcellations shows no change in SFC at seizure onset, we may introduce a Type II statistical error.

**Predictive validity** of an atlas indicates the ability of a certain measure to predict some other criterion measure<sup>49</sup>. For example, it can be incorporated into an analysis pipeline to predict a change in response to a perturbation, such as a drug, electrical or chemical stimulation, or a dynamical disease state. In our study, the perturbation is the change in brain state at seizure onset. Predicting functional changes in epilepsy using noninvasive structural neuroimaging is particularly useful clinically and will lessen the need for costly and invasive implantations in patients. An atlas that adequately captures  $\Delta$ SFC with seizure onset will allow us to form network models to predict seizure related activity in areas without implantations. We have shown that not all atlases allow us to predict this change in the structure-function relationship within the brain.

**Limitations.** Our study is not without limitations. A major limitation is that we did not evaluate atlases in a diverse set of experimental systems, but rather limited our analysis to a contemporary topic in epilepsy linking two diverse measurement modalities of the brain to solve a clinical problem. We did not perform a feature selection analysis post-hoc to maximize  $\Delta$ SFC at seizure onset; rather, we performed a comprehensive evaluation of many atlases to set a general framework and describe the nuances between the different atlases and their features. We hope this framework can be applied to many experimental designs. Ideally in our study, we required a whole-brain, volumetric atlas that covered the implanted SEEG electrode contacts. No such atlas existed. We opted for combining different atlases or developing randomly parcellated atlases used in previous publications<sup>31,50</sup>, however, no general framework existed to determine which atlas should be used or clearly outlined the feature space of these atlases. We had no formal basis for how changing an atlas could change our results and eventual goal for translating network models to better treat epilepsy patients.

Another limitation is that we assume a change in SFC supports the hypothesis that seizures harness the underlying structural connectome of the brain (along with support from prior literature<sup>23,24,51</sup>). We may be biasing our results to select an atlas that maximizes  $\Delta$ SFC. However, we wish to select a methodology that allows us to measure *any change* in brain state that accompanies seizure onset (explanatory validity), permitting us to probe epilepsy biology and understand the processes that govern seizure spread.

Finally, our analysis relies on the assumption that an atlas approach must be used to quantify SFC and does not consider an atlas agnostic approach nor if such an approach is appropriate. To study SFC using networks, both structure and functional networks must have nodes representing the same entity – neuroanatomical structures. The atlases defining anatomical structures (whether they are functionally, histologically, genetically, procedurally, multi-modally, or randomly defined) are the link between structural connectivity and functional connectivity measurements of the brain. To study SFC, we must rely on the neuroanatomical structures defined by an atlas, then localize electrodes to these regions and correlate the structural measurements (e.g. streamlines, fractional anisotropy, mean diffusivity) with functional measurements (e.g. cross-correlation, coherence, mutual information). Fundamentally, we are defining the nodes of the brain in advance,

447 which can alter our results; a more comprehensive discussion  
448 on defining the nodes of the brain are in Fornito et al. 2016  
449 and Bijsterbosh et al. 2017<sup>45,47</sup>.

450 In conclusion, the publication of atlases and their distribu-  
451 tion across neuroimaging software platforms has risen expo-  
452 nentially over the last three decades. We simulate a study in  
453 which a researcher is blind to the development or features of  
454 an atlas and chooses one based on the availability in common  
455 neuroimaging pipelines and software (e.g. Freesurfer, DSI  
456 studio, FSL, SPM, QSIprep, fMRIprep, MRIcron, ANTs, and  
457 others). We advocate that while using a minimum of two at-  
458 lases (one in the main text and one in the supplement) is one  
459 solution to understanding how results are affected by atlases  
460 choice, our framework provides a general solution. Researchers  
461 should instead justify *why* the atlas selected is appropriate  
462 using our framework above. Our study illustrates the critical  
463 need to evaluate the reproducibility of neuroscience research  
464 using atlases published alongside tools and analysis pipelines  
465 already established in the neuroscience community. Please  
466 see our [GitHub](#) for the atlases curated in this study along  
467 with their direct primary sources listed in [Table S1](#). Our work  
468 provides a comprehensive resource for others investigating the  
469 brain's structure and function.

## 470 Funding

471 This work was supported by National Institutes of Health  
472 grants 1R01NS099348, K23-NS073801, 1R01NS085211, and  
473 1R01MH112847. We also acknowledge support by the Thorn-  
474 ton Foundation, the Mirowski Family Foundation, the ISI  
475 Foundation, the John D. and Catherine T. MacArthur Foun-  
476 dation, the Sloan Foundation, and the Paul Allen Foundation.

## 477 Competing Interests

478 The authors declare no competing interests.

## 479 Materials and Methods

480 **Human Dataset.** MRI data was collected from forty-one individuals,  
481 including thirteen healthy controls and twenty-eight drug-resistant  
482 epilepsy patients at the Hospital of the University of Pennsylva-  
483 nia. Twenty-four patients underwent stereoelectroencephalogra-  
484 phy (SEEG) implantation and four underwent electrocorticography  
485 (ECoG) implantation. Ten of the SEEG patients had clinically an-  
486 notated seizures and were used for SFC analyses. Inclusion criteria  
487 consisted of all individuals who agreed to participate in our research  
488 scanning protocol, and (if they had implantations) allowed their  
489 de-identified intracranial EEG (iEEG) data to be publicly available  
490 for research purposes on the International Epilepsy Electrophysio-  
491 logic Portal (<https://www.ieeg.org>)<sup>52,53</sup>. Seizure evaluation was  
492 determined via comprehensive clinical assessment, which included  
493 multimodal imaging, scalp and intracranial video-EEG monitoring,  
494 and neuropsychological testing. This study was approved by the  
495 Institutional Review Board of the University of Pennsylvania, and  
496 all subjects provided written informed consent prior to participating.  
497 See [Table S2](#) for subject demographics.

498 **Structure.** Methods and pipelines for structural connectivity genera-  
499 tion and analysis are described in the following sections. Specific  
500 [GitHub](#) files and code are included where applicable.

501 **Imaging Protocol.** Prior to electrode implantation, MRI data were  
502 collected on a 3T Siemens Magnetom Trio scanner using a 32-  
503 channel phased-array head coil. High-resolution anatomical images  
504 were acquired using a magnetization prepared rapid gradient echo

(MPRAGE) T1-weighted sequence (repetition time = 1810 ms, echo  
time = 3.51ms, flip angle = 9, field of view = 240mm, resolution =  
0.94x0.94x1.0 mm<sup>3</sup>). High Angular Resolution Diffusion Imaging  
(HARDI) was acquired with a single-shot EPI multi-shell diffusion-  
weighted imaging (DWI) sequence (116 diffusion sampling directions,  
b-values of 0, 300, 700, and 2000s/mm<sup>2</sup>, resolution = 2.5x2.5x2.5  
mm<sup>3</sup>, field of view = 240mm). Following electrode implantation,  
spiral CT images (Siemens) were obtained clinically for the pur-  
poses of electrode localization. Both bone and tissue windows were  
obtained (120kV, 300mA, axial slice thickness = 1.0mm)

**Diffusion Weighted Imaging (DWI) Preprocessing.** HARDI images  
were subject to preprocessing pipeline QSIprep to ensure repro-  
ducibility and implementation of the best practices for processing  
of diffusion images<sup>54</sup>. Briefly, QSIprep performs advanced recon-  
struction and tractography methods in curated workflows using  
tools from leading software packages, including FSL, ANTs, and  
DSI Studio with input data specified in the Brain Imaging Data  
Structure (BIDS) layout.

**Structural Network Generation.** DSI-Studio ([http://dsi-  
studio.labsolver.org](http://dsi-studio.labsolver.org), version: December 2020) was used to  
reconstruct the orientation density functions within each voxel  
using generalized q-sample imaging with a diffusion sampling  
length ratio of 1.25<sup>55</sup>. Deterministic whole-brain fiber tracking  
was performed using an angular threshold of 35 degrees, step  
size of 1mm, and quantitative anisotropy threshold based on  
Otsu's threshold<sup>56</sup>. Tracks with length shorter than 10mm or  
longer than 800mm were discarded, and a total of 1,000,000  
tracts were generated per brain. Deterministic tractography  
was chosen based upon prior work indicating that deterministic  
tractography generates fewer false positive connections than  
probabilistic approaches, and that network-based estimations are  
substantially less accurate when false positives are introduced into  
the network compared with false negatives<sup>31</sup>. To calculate structural  
connectivity, atlases listed in [Table 1](#) were used. Structural  
networks were generated by computing the number of streamlines  
passing through each pair of structural regions in each specific atlas.  
Streamline counts were log-transformed and normalized to the  
maximum streamline count, as is common in prior studies<sup>26,57-59</sup>.  
[GitHub](#): packages/imaging/tractography/tractography.py

**Atlases.** Atlas descriptions and sources used in this study are found  
in [Table S1](#). All atlases were sourced in MNI space and if not  
already, resliced to dimensions 182x218x182. Atlases were linear  
then non-linear registered to T1w subject space using the ICBM  
2009c Nonlinear Asymmetric template<sup>60</sup> and FSL flirt and fnirt. In  
addition to published standard atlases demarcating neuroanatomical  
and functional boundaries, we used whole-brain random atlases.  
A limitation of most standard atlases is that they may not have  
anatomical definitions for all regions of the brain, and therefore,  
implanted electrodes may not be assigned properly to a region.  
Whole-brain random atlases, in contrast, provide coverage to all  
implanted electrodes. They also allow for the ability to change  
some morphological properties (i.e. parcellation size), while keeping  
other morphologies the same (i.e. parcellation shape; [Fig. 2d](#)).  
A limitation of random atlases is that regions may not represent  
true anatomical or functional boundaries. With the limitations for  
each approach in mind, analyses were conducted for both standard  
and random atlases. Random atlases were built in the ICBM  
template space and covered all voxels, excluding those labeled as  
CSF or outside the template. To fill these points, a pseudo grassfire  
algorithm was applied<sup>31</sup>. Briefly, N points representing the number  
of ROIs of the atlas were randomly chosen as seed points. These  
seed points were iteratively expanded in all six Cartesian directions  
until all points were covered by one of the initial N seeds. After each  
iterative step, the smallest volume region expanded first. Random  
atlases created were of N equal to 10, 30, 50, 75, 100, 200, 300, 400,  
500, 750, 1000, 2000, 5000, and 10000 ROIs. Five permutations  
for each N were created. [GitHub](#) code to generate random atlases:  
packages/imaging/randomAtlas/randomAtlasGeneration.py

**Atlas Morphology: Volume and Sphericity.** Atlas morphological mea-  
surements included regions of interest (ROI) size and shape, and

575 were measured with volume and sphericity calculations, respec- 644  
576 tively (Fig. 2). Region volume was calculated as the number of 645  
577 voxels in an ROI and log10 transformed. Region sphericity was 646  
578 calculated as the ratio of the surface area of a sphere with an 647  
579 equal volume of the ROI to the actual surface area of the atlas 648  
580 ROI. Under this definition, sphericity is bounded from 0 to 1 649  
581 where 1 is a perfect sphere. For reference, a perfect cube and a 650  
582 hemi-sphere have a sphericity of 0.8 and 0.7 respectively. GitHub:  
583 packages/imaging/regionMorphology/regionMorphology.py

584 **Structural Network Measures.** We characterized the structural net- 644  
585 work topology of 52 atlases (Fig. 3 and Fig. S3). To quantify 645  
586 network topology, we examined density, mean degree, mean clus- 646  
587 tering coefficient, characteristic path length, and small worldness. 647  
588 Connectivity matrices were first binarized and a distance matrix 648  
589 was computed. The distance of any nodes that were disconnected 649  
590 from the main graph was set to the maximum distance between 650  
591 any pair of nodes in the main graph. Density, mean degree, clus- 644  
592 tering coefficient, and characteristic path length were then cal- 645  
593 culated on the binary, undirected graphs. Small worldness was 646  
594 calculated as the  $\sigma$ -ratio where  $\sigma = \gamma/\lambda$  and is the ratio of the 647  
595 average, normalized clustering coefficient,  $C$ , to the normalized 648  
596 characteristic path length,  $L$ .  $\gamma = CG/CR$  and  $\lambda = lG/lR$  where  $G$  649  
597 is the graph of interest and  $R$  represents a ‘random’ graph that is 650  
598 equivalent to  $G$ . To approximate the equivalent random graph  $R$  644  
599 due to intractable computational costs<sup>61</sup>, a well-known analytical 645  
600 equivalent  $CR = d/N$  and  $lR = \log N/\log d$  were used, where  $d$  646  
601 denotes average nodal degree. All network measures were calculated 647  
602 using the **Brain Connectivity Toolbox for Python**. GitHub: pa- 648  
603 pers/brainAtlas/Script\_05\_structure\_02\_network\_measures.py

604 **Function.** Methods and pipelines for functional connectivity genera- 644  
605 tion and analysis are described in the following sections. Specific 645  
606 GitHub files and code are included where applicable. 646

607 **Intracranial EEG Acquisition.** Stereotactic Depth Electrodes were 644  
608 implanted in patients based on clinical necessity. Continuous SEEG 645  
609 signals were obtained for the duration of each patient’s stay in the 646  
610 epilepsy monitoring unit. Intracranial data was recorded at either 647  
611 512 or 1024 Hz for each patient. Seizure onset times were defined by 648  
612 the unequivocal onset<sup>62</sup>. Seizure types were classified using ILAE 649  
613 2017 criteria<sup>63</sup> as focal aware, focal impaired awareness, or focal to 650  
614 bilateral tonic-clonic. All annotations were verified and consistent 644  
615 with detailed clinical documentation. If a patient had more than one 645  
616 seizure annotated, the first seizure longer than 30 seconds without 646  
617 artifacts was used. iEEG times used in the study are sourced in 647  
618 the Box folder (below) and iEEG snippets are downloaded using 648  
619 GitHub script in packages/eeg/ieegOrg/downloadiEEGorg.py

620 **Electrode Localization.** In-house software<sup>64</sup> was used to assist in lo- 644  
621 calizing electrodes after registration of pre-implant and post-implant 645  
622 neuroimaging data. All electrode coordinates and labels were saved 646  
623 and matched with the electrode names on IEEG.org. All electrode lo- 647  
624 calizations were verified by a board-certified neuroradiologist (J.S.). 648  
625 Electrode coordinates in patient T1w space were assigned to an 649  
626 atlas ROI also registered in patient T1w space. Electrodes that fell 650  
627 outside the atlas of interest were excluded from subsequent analysis.  
628 GitHub: packages/atlasLocalization/atlasLocalization.py

629 **Functional Connectivity Network Generation.** Functional connectiv- 644  
630 ity networks were generated from four periods: interictal, preictal, 645  
631 ictal, and postictal. (1) The interictal period consisted of the time 646  
632 approximately 6 hours before the ictal period. (2) The preictal 647  
633 period consisted of the time immediately before the ictal period. 648  
634 (3) The ictal period consisted of the time between the seizure un- 649  
635 unequivocal onset and seizure termination. (4) The postictal period 650  
636 consisted of the time immediately after the ictal period. Interictal, 644  
637 preictal, and postictal periods were 180 seconds in duration. Fol- 645  
638 lowing removal of artifact-ridden electrodes, SEEG signals inside 646  
639 either GM or WM for each period were common-average referenced 647  
640 to reduce potential sources of correlated noise<sup>65</sup>. Next, each period 648  
641 was divided into 2s time windows with 1s overlap<sup>66–69</sup>. To generate 649  
642 a functional network representing broadband functional interactions 650  
643 between SEEG signals (Fig. 4b), we carried out a method described

in detail previously<sup>23,68</sup>. Namely, signals were notch-filtered at 60 644  
Hz to remove power line noise, low-pass and high-pass filtered at 127 645  
Hz and 1Hz to account for noise and drift, and pre-whitened using 646  
a first-order autoregressive model to account for slow dynamics. 647  
Functional networks were then generated by applying a normalized 648  
cross correlation function  $\rho$  between the signals of each pair of 649  
electrodes within each time window, using the formula: 650

$$\rho_{xy} = \max_{\tau} \left[ \frac{1}{T} \sum_{t=1}^T \frac{[x_k(t) - \bar{x}_k] * [y_k(t + \tau) - \bar{y}_k]}{\sigma_{x_k} \sigma_{y_k}} \right] \quad 651$$

where  $x$  and  $y$  are signals from two electrodes,  $k$  is the 2s time 652  
window,  $t$  is one of the  $T$  samples during the time window, and 653  
 $\tau$  is the time lag between signals, with a maximum lag of 0.5 s. 654  
Functional connectivity measurements were also calculated for co- 655  
herence, zero time-lag Pearson and Spearman rank correlations 656  
with associated p-values, and mutual information. They are in- 657  
cluded in the freely available open source dataset but were not used 658  
in hypothesis testing in the study. Also freely available are the 659  
functional connectivity measurements in defined frequency bands 660  
reviewed in Newson and Thiagarajan 2019<sup>70</sup>. Networks are repre- 661  
sented as full-weighted adjacency matrices. GitHub Code: GitHub: 662  
code/tools/echobase.py 663

**Structure-Function Correlation.** To quantify the relationship between 664  
structure and function in the epileptic brain, we computed the Spear- 665  
man Rank correlation coefficient between the edges of the structural 666  
connectivity networks and the edges of the functional connectivity 667  
network (Fig. 4c). In the case where multiple electrodes fell in the 668  
same atlas ROI, a random electrode was selected to represent the 669  
functional activity of that neuroanatomically defined region. To 670  
reproduce these results, random seed was set to 42 using the NumPy 671  
Python package. Note that atlases with very small ROI volumes in- 672  
cluded more electrodes for SFC calculation. Electrodes that did not 673  
localize to an atlas were excluded from analysis. To average the SFC 674  
for all patients and each atlas (Fig. 5), SFC time-series was resam- 675  
pled to 100 seconds for each period and each sample was averaged 676  
together. GitHub code: packages/eeg/echobase/echobase.py 677

**rsSFC and  $\Delta$ SFC.** Resting-state SFC (rsSFC) was defined as the SFC 678  
during the interictal period, approximately 6 hours before the ictal 679  
period. The mean SFC of that period was computed.  $\Delta$ SFC was 680  
defined as the change in the mean SFC from the preictal to the ictal 681  
period (Fig. 5 top left panel). rsSFC and  $\Delta$ SFC was calculated for 682  
each atlas (Fig. 6). 683

**Statistics.** Preictal and ictal SFC for each atlas were compared and 684  
significance was determined using the non-parametric repeated 685  
measures Wilcoxon signed-rank test. Bonferroni correction was 686  
applied over the 52 tests performed, equaling to the number of 687  
atlases studied. 688

**Data availability and Reproducibility.** All code 689  
files used in this manuscript are available at 690  
<https://github.com/andyrevell/revellLab>. All de-identified 691  
raw and processed data (except for patient MRI imaging) are 692  
available for download on Box. Link provided on GitHub. The 693  
GitHub repository used to analyze the data is also contained within 694  
Box. Raw imaging data is available upon reasonable request from 695  
Principal Investigator K.A.D.; tractography files generated from 696  
the imaging data are readily available on Box. iEEG snippets 697  
used specifically in this manuscript are contained within the Box 698  
data folder, while full iEEG recordings are publicly available at 699  
<https://www.ieeg.org>. The Python environment for the exact 700  
packages and versions used in this study is contained in the 701  
environment directory within the GitHub. The QSIPrep docker 702  
container was used for DWI preprocessing. 703

**ACKNOWLEDGMENTS.** We thank Adam Gibson, Carolyn 704  
Wilkinson, Jacqueline Boccanfuso, Magda Wernovsky, Ryan Archer, 705  
Kelly Oechsel, members of Andrew’s Thesis Committee, and all 706  
other members and staff of the Center for Neuroengineering and 707  
Therapeutics for their continued help and support in this work. 708

## 709 References

- 710 [1] Klein, A. & Tourville, J. 101 labeled brain images and a consistent human cortical labeling  
711 protocol. *Frontiers in Neuroscience* **6** (2012).
- 712 [2] Mandal, P. K., Mahajan, R. & Dinov, I. D. Structural brain atlases: design, rationale, and  
713 applications in normal and pathological cohorts. *Journal of Alzheimer's disease : JAD* **31**  
714 **Suppl 3**, S169–88 (2012).
- 715 [3] Dickie, D. *et al.* Whole brain magnetic resonance image atlases: A systematic review of  
716 existing atlases and caveats for use in population imaging. *Front Neuroinform* **11**, 1 (2017).
- 717 [4] Bohland, J. W., Bokil, H., Allen, C. B. & Mitra, P. P. The brain atlas concordance problem:  
718 Quantitative comparison of anatomical parcellations. *PLoS ONE* **4**, e7200 (2009).
- 719 [5] Beal, D. S. *et al.* The trajectory of gray matter development in broca's area is abnormal in  
720 people who stutter. *Frontiers in Human Neuroscience* **9** (2015).
- 721 [6] Van Horn, J. D. *et al.* Mapping connectivity damage in the case of phineas gage. *PLoS ONE*  
722 **7**, e37454 (2012).
- 723 [7] Barker, F. G. Phineas among the phrenologists: the american crowbar case and nineteenth-  
724 century theories of cerebral localization. *Journal of Neurosurgery* **82**, 672–682 (1995).
- 725 [8] Mazziotta, J. *et al.* A probabilistic atlas and reference system for the human brain: Interna-  
726 tional consortium for brain mapping (icbm). *Philosophical Transactions of the Royal Society*  
727 *of London. Series B: Biological Sciences* **356**, 1293–1322 (2001).
- 728 [9] Evans, A. C., Janke, A. L., Collins, D. L. & Baillet, S. Brain templates and atlases. *NeuroImage*  
729 **62**, 911–922 (2012).
- 730 [10] Society, N. G. atlas. *National Geographic Society* (2011).
- 731 [11] Society, N. G. border. *National Geographic Society* (2011).
- 732 [12] Makris, N. *et al.* Decreased volume of left and total anterior insular lobe in schizophrenia.  
733 *Schizophrenia Research* **83**, 155–171 (2006).
- 734 [13] Hammers, A. *et al.* Three-dimensional maximum probability atlas of the human brain, with  
735 particular reference to the temporal lobe. *Human Brain Mapping* **19**, 224–247 (2003).
- 736 [14] Thomas Yeo, B. T. *et al.* The organization of the human cerebral cortex estimated by intrinsic  
737 functional connectivity. *Journal of Neurophysiology* **106**, 1125–1165 (2011).
- 738 [15] Schaefer, A. *et al.* Local-global parcellation of the human cerebral cortex from intrinsic func-  
739 tional connectivity mri. *Cerebral Cortex* **28**, 3095–3114 (2018).
- 740 [16] Glasser, M. F. *et al.* A multi-modal parcellation of human cerebral cortex. *Nature* **536**, 171–  
741 178 (2016).
- 742 [17] Coalson, T. S., Van Essen, D. C. & Glasser, M. F. The impact of traditional neuroimaging  
743 methods on the spatial localization of cortical areas. *Proceedings of the National Academy*  
744 *of Sciences* **115**, E6356–E6365 (2018).
- 745 [18] Wu, Z., Xu, D., Potter, T., Zhang, Y. & The, A. D. N. I. Effects of brain parcellation on the  
746 characterization of topological deterioration in alzheimer's disease. *Frontiers in Aging Neuro-*  
747 *science* **11**, 113 (2019).
- 748 [19] Van Essen, D. C. *et al.* The wu-minn human connectome project: an overview. *NeuroImage*  
749 **80**, 62–79 (2013).
- 750 [20] Li, G. *et al.* Optimal referencing for stereo-electroencephalographic (seeg) recordings. *Neu-*  
751 *roImage* **183**, 327–335 (2018).
- 752 [21] Freeman, W. J., Rogers, L. J., Holmes, M. D. & Silbergeld, D. L. Spatial spectral analysis of  
753 human electrocorticograms including the alpha and gamma bands. *Journal of Neuroscience*  
754 *Methods* **95**, 111–121 (2000).
- 755 [22] Slutzky, M. W. *et al.* Optimal spacing of surface electrode arrays for brain-machine interface  
756 applications. *Journal of Neural Engineering* **7**, 026004 (2010).
- 757 [23] Shah, P. *et al.* Characterizing the role of the structural connectome in seizure dynamics. *Brain*  
758 *: a journal of neurology* (2019).
- 759 [24] Ashourvan, A. *et al.* Pairwise maximum entropy model explains the role of white matter  
760 structure in shaping emergent co-activation states. *Commun Biol* **4** (2021).
- 761 [25] Proix, T., Bartolomei, F., Guye, M. & Jirsa, V. K. Individual brain structure and modelling  
762 predict seizure propagation. *Brain : a journal of neurology* **140**, 641–654 (2017).
- 763 [26] Wirsich, J. *et al.* Whole-brain analytic measures of network communication reveal increased  
764 structure-function correlation in right temporal lobe epilepsy. *NeuroImage. Clinical* **11**, 707–  
765 718 (2016).
- 766 [27] Willner, P. The validity of animal models of depression. *Psychopharmacology* **83**, 1–16  
767 (1984).
- 768 [28] Bassett, D. S., Zurn, P. & Gold, J. I. On the nature and use of models in network neuroscience.  
769 *Nature Reviews Neuroscience* **19**, 566–578 (2018).
- 770 [29] Association, A. P. Technical recommendations for psychological tests and diagnostic tech-  
771 niques. *Psychological bulletin* **51**, 1–38 (1954).
- 772 [30] Salehi, M. *et al.* There is no single functional atlas even for a single individual: Functional  
773 parcel definitions change with task. *NeuroImage* **208**, 116366 (2020).
- 774 [31] Zalesky, A. *et al.* Whole-brain anatomical networks: does the choice of nodes matter? *Neu-*  
775 *roImage* **50**, 970–983 (2010).
- 776 [32] Stacey, W. *et al.* Emerging roles of network analysis for epilepsy. *Epilepsy Res.* **159**, 106255  
777 (2020).
- 778 [33] Cocchi, L. *et al.* Disruption of structure-function coupling in the schizophrenia connectome.  
779 *NeuroImage. Clinical* **4**, 779–787 (2014).
- 780 [34] Sathian, K. & Crosson, B. Structure-function correlations in stroke. *Neuron* **85**, 887–889  
781 (2015).
- 782 [35] Gorgolewski, K. J. *et al.* Neurovault.org: a web-based repository for collecting and sharing  
783 unthresholded statistical maps of the human brain. *Frontiers in neuroinformatics* **9**, 8 (2015).
- 784 [36] Lawrence, R. M. *et al.* Standardizing human brain parcellations. *Scientific data* **8**, 78 (2021).
- 785 [37] Alexander, B. *et al.* A new neonatal cortical and subcortical brain atlas: the melbourne  
786 children's regional infant brain (m-crib) atlas. *NeuroImage* **147**, 841–851 (2017).
- 787 [38] Brennan, B. P. *et al.* Use of an individual-level approach to identify cortical connectivity  
788 biomarkers in obsessive-compulsive disorder. *Biological psychiatry. Cognitive neuroscience*  
789 *and neuroimaging* **4**, 27–38 (2019).
- 790 [39] Cabezas, M., Oliver, A., Lladó, X., Freixenet, J. & Cudra, M. B. A review of atlas-based  
segmentation for magnetic resonance brain images. *Computer methods and programs in* 791  
*biomedicine* **104**, e158–77 (2011). 792
- [40] Caspers, S., Eickhoff, S. B., Zilles, K. & Amunts, K. Microstructural grey matter parcellation 793  
and its relevance for connectome analyses. *NeuroImage* **80**, 18–26 (2013). 794
- [41] Diedrichsen, J., Balsters, J. H., Flavell, J., Cussans, E. & Ramnani, N. A probabilistic mr atlas 795  
of the human cerebellum. *NeuroImage* **46**, 39–46 (2009). 796
- [42] Belzung, C. & Lemoine, M. Criteria of validity for animal models of psychiatric disorders: 797  
focus on anxiety disorders and depression. *Biology of mood & anxiety disorders* **1**, 9 (2011). 798
- [43] Association, A. E. R., Association, A. P., Education, N. C. o. M. i., (U.S., J. C. o. S. f. E. 799  
& Testing, P. *Standards for Educational and Psychological Testing* (American Educational 800  
Association, 2014). 801
- [44] Sporns, O., Tononi, G. & Kötter, R. The human connectome: A structural description of the 802  
human brain. *PLoS computational biology* **1**, e42 (2005). 803
- [45] Fornito, A., Zalesky, A. & Bullmore, E. *Fundamentals of Brain Network Analysis* (Academic 804  
Press, 2016). 805
- [46] Sporns, O. The human connectome: a complex network. *Annals of the New York Academy* 806  
*of Sciences* **1224**, 109–125 (2011). 807
- [47] Bijsterbosch, J., Smith, S. M. & Beckmann, C. F. *An Introduction to Resting State fMRI* 808  
*Functional Connectivity* (Oxford University Press, 2017). 809
- [48] Yaakub, S. N. *et al.* On brain atlas choice and automatic segmentation methods: a compar- 810  
ison of maper & freesurfer using three atlas databases. *Scientific reports* **10**, 2837 (2020). 811
- [49] Shmueli, G. To explain or to predict. *Statistical Science* **25** (2010). 812
- [50] Mišić, B. *et al.* Cooperative and competitive spreading dynamics on the human connectome. 813  
*Neuron* **86**, 1518–1529 (2015). 814
- [51] Betzel, R. F. *et al.* Structural, geometric and genetic factors predict interregional brain con- 815  
nectivity patterns probed by electrocorticography. *Nature Biomedical Engineering* (2019). 816
- [52] *A multimodal platform for cloud-based collaborative research* (IEEE, 2013). 817
- [53] Kini, L. G., Davis, K. A. & Wagenaar, J. B. Data integration: Combined imaging and electro- 818  
physiology data in the cloud. *NeuroImage* **124**, 1175–1181 (2016). 819
- [54] Cieslak, M. *et al.* Qsiprep: An integrative platform for preprocessing and reconstructing 820  
diffusion mri. *Biorxiv* (2020). 821
- [55] Fang-Cheng, Y., Wedeen, V. J. & Tseng, W.-Y. I. Generalized q-sampling imaging. *IEEE* 822  
*Transactions on Medical Imaging* **29**, 1626–1635 (2010). 823
- [56] Otsu, N. A threshold selection method from gray-level histograms. *IEEE Transactions on* 824  
*Systems, Man, and Cybernetics* **9**, 62–66 (1979). 825
- [57] Bonilha, L., Gleichgerrcht, E., Nesland, T., Rorden, C. & Fridriksson, J. Gray matter axonal 826  
connectivity maps. *Frontiers in Psychiatry* **6** (2015). 827
- [58] Park, B., Eo, J. & Park, H.-J. Structural brain connectivity constrains within-a-day variability 828  
of direct functional connectivity. *Frontiers in Human Neuroscience* **11**, 408 (2017). 829
- [59] Taylor, P. N. *et al.* The impact of epilepsy surgery on the structural connectome and its relation 830  
to outcome. *NeuroImage. Clinical* **18**, 202–214 (2018). 831
- [60] Fonov, V. *et al.* Unbiased average age-appropriate atlases for pediatric studies. *NeuroImage* 832  
**54**, 313–327 (2011). 833
- [61] Maslov, S. Specificity and stability in topology of protein networks. *Science* **296**, 910–913 834  
(2002). 835
- [62] Litt, B. *et al.* Epileptic seizures may begin hours in advance of clinical onset: a report of five 836  
patients. *Neuron* **30**, 51–64 (2001). 837
- [63] Fisher, R. S. *et al.* Operational classification of seizure types by the international league 838  
against epilepsy: Position paper of the ilae commission for classification and terminology. 839  
*Epilepsia* **58**, 522–530 (2017). 840
- [64] Azarion, A. A. *et al.* An open-source automated platform for three-dimensional visualization 841  
of subdural electrodes using ct-mri coregistration. *Epilepsia* **55**, 2028–2037 (2014). 842
- [65] Ludwig, K. A. *et al.* Using a common average reference to improve cortical neuron recordings 843  
from microelectrode arrays. *Journal of neurophysiology* **101**, 1679–1689 (2009). 844
- [66] Kramer, M. A. *et al.* Coalescence and fragmentation of cortical networks during focal seizures. 845  
*The Journal of neuroscience : the official journal of the Society for Neuroscience* **30**, 10076–  
10085 (2010). 846
- [67] Khambhati, A. N. *et al.* Dynamic network drivers of seizure generation, propagation and 847  
termination in human neocortical epilepsy. *PLoS computational biology* **11**, e1004608 (2015). 848
- [68] Khambhati, A. N., Davis, K. A., Lucas, T. H., Litt, B. & Bassett, D. S. Virtual cortical resection 849  
reveals push-pull network control preceding seizure evolution. *Neuron* **91**, 1170–1182 (2016). 850
- [69] Khambhati, A. N. *et al.* Recurring functional interactions predict network architecture of inter- 851  
ictal and ictal states in neocortical epilepsy. *eNeuro* **4**, ENEURO.0091–16.2017 (2017). 852
- [70] Newson, J. J. & Thiagarajan, T. C. Eeg frequency bands in psychiatric disorders: A review of 853  
resting state studies. *Frontiers in Human Neuroscience* **12**, 521 (2019). 854  
855
